# Supplementary material for: Ultrafast preparation of three-dimensional porous tin–graphene composites with superior lithium ion storage
Source: Royal Society of Chemistry journal article supplement (doi:10.1039/c4ta02021a), 2014-06-05
Supplement: c4ta02021a1.pdf [file c4ta02021a1.pdf]

## Support information

### Preparation of the working electrode

Fig. S1 shows digital photos of the Ni foam prior and after the electrophoretic deposition treatment. After the electrophoretic deposition process, the Ni foam coated with Sn-GNS was cut off from line "l" in Fig. S1b, and pressed under a pressure of 10 MPa, and then used as the working electrode directly. And the amount of active materials loading on each piece of Ni foam (about 10 mm in diameter) is ca. 1.2 mg cm<sup>-2</sup>.

### Support information

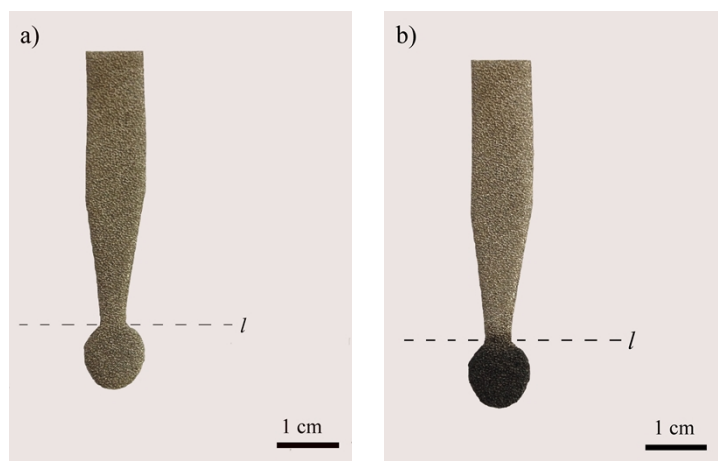

**Fig. S1** Digital photos of the Ni foam (a) prior the electrophoretic deposition treatment (b) after the electrophoretic deposition treatment

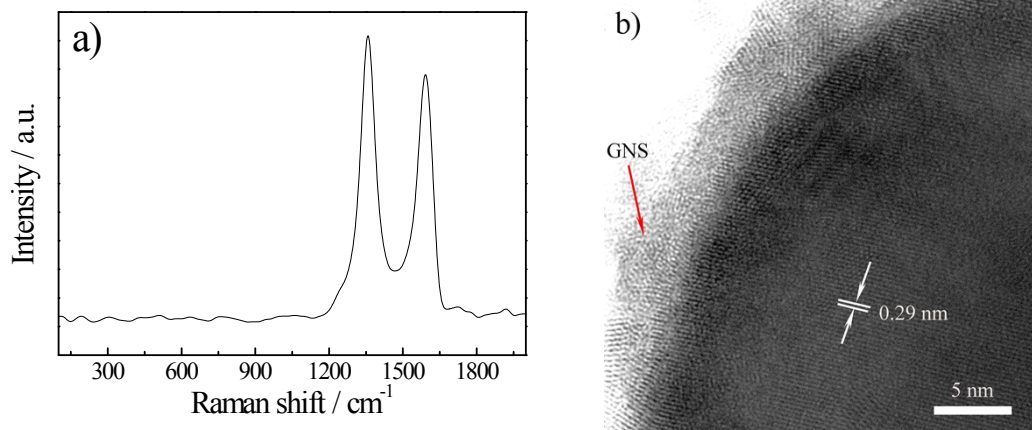

**Fig. S2** (a) Raman spectrum of the Sn-GNS composite scratched down from the Ni foam (b) HRTEM image of the Sn-GNS composite scratched down from the Ni foam

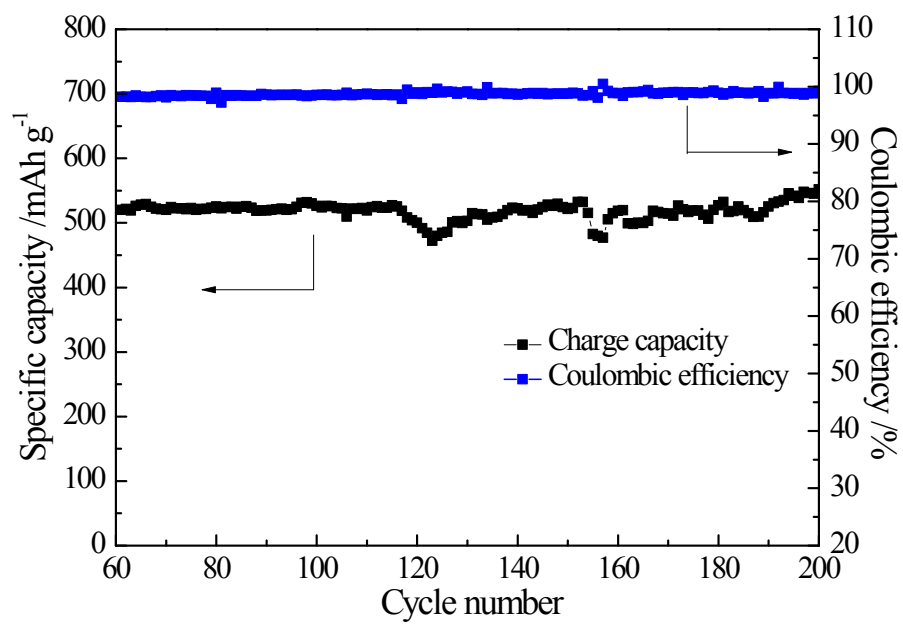

**Fig. S3** The cyclic performance of 3D Sn-GNS from the 61st cycle to the 200th cycle
